# Supplementary material for: The role of the adaptor molecule STING during Schistosoma mansoni infection
Source: PubMed Central journal article supplement (PMC7220917; doi:10.1038/s41598-020-64788-6), 2020-05-13
Supplement: 41598_2020_64788_MOESM1_ESM.pdf [file 41598_2020_64788_MOESM1_ESM.pdf]

## The role of the adaptor molecule STING during *Schistosoma mansoni* infection

Cláudia Souza<sup>1,&</sup>, Rodrigo C. O. Sanches<sup>1,&</sup>, Natan R. G. Assis<sup>1</sup>, Fábio V. Marinho<sup>1</sup>, Fábio S. Mambelli<sup>2</sup>, Suellen B. Morais<sup>1</sup>, Enrico G. T. Gimenez<sup>1</sup>, Erika S. Guimarães<sup>1</sup>, Tiago B. R. Castro<sup>1</sup> & Sergio C. Oliveira<sup>1,2,3,\*</sup>

<sup>1</sup>Departamento de Bioquímica e Imunologia, Instituto de Ciências Biológicas, Universidade Federal de Minas Gerais, Belo Horizonte, MG, Brazil; <sup>2</sup>Departamento de Genética, Ecologia e Evolução, Instituto de Ciências Biológicas, Universidade Federal de Minas Gerais, Belo Horizonte, MG, Brazil; <sup>3</sup>Instituto Nacional de Ciência e Tecnologia em Doenças Tropicais (INCT-DT), Conselho Nacional de Desenvolvimento Científico e Tecnológico, Ministério de Ciência Tecnologia e Inovação Salvador, Bahia, Brazil. & These authors equally contributed to this work, \*Correspondence and requests for materials should be addressed to S.C.O (e-mail: scozeus1@gmail.com).

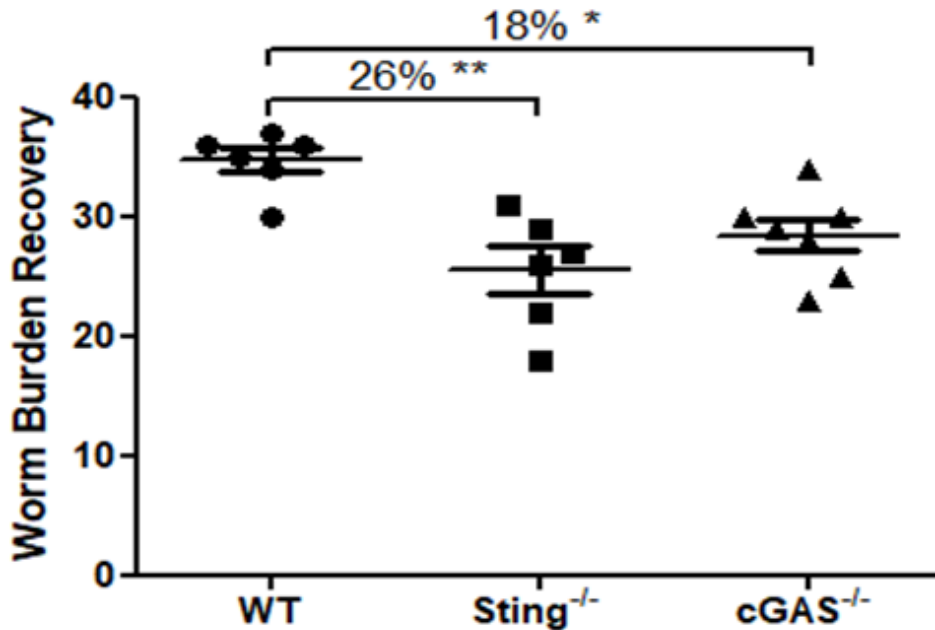

**Figure S1. Worm burden recovery in *Sting*<sup>-/-</sup> and *cGAS*<sup>-/-</sup> mice.** C57BL/6 (WT), *Sting*<sup>-/-</sup> and *cGAS*<sup>-/-</sup> mice (n=10) were infected with 100 *S. mansoni* cercariae and, after 45 days of infection, the total number of worms recovered. (\*) and (\*\*) are used to demonstrate statistical differences at p < 0.05 or p < 0.01 compared to the WT mice, respectively. One-Way ANOVA with Bonferroni adjustments were included for multiple comparisons.

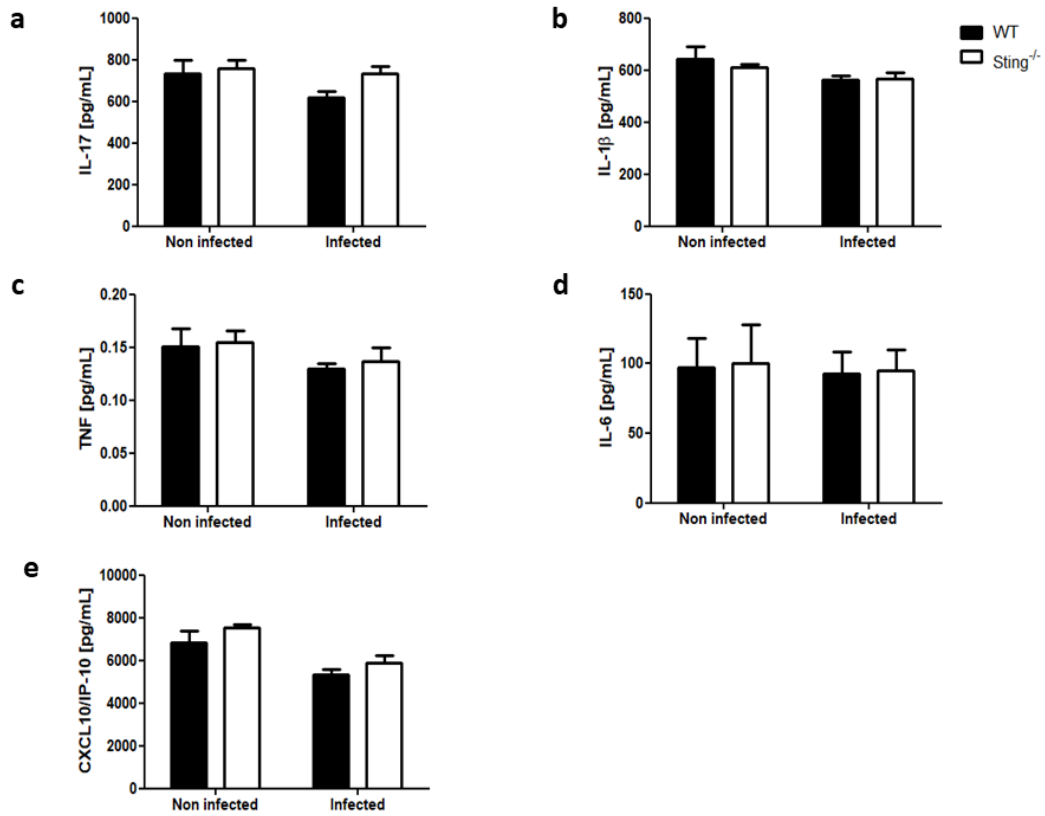

**Figure S2. Cytokine profile in the lung.** C57BL/6 (WT) and *Sting*<sup>-/-</sup> mice were infected with *S. mansoni* cercariae and after 13 days of infection, the lungs were collected, homogenized in cytokine extraction solution and centrifuged. Supernatants were used for IL-17 (n=5) (A), IL-1 $\beta$  (n=5) (B), TNF- $\alpha$  (n=5) (C), IL-6 (n=5) (D), and CXCL10/IP-10 (n=5) (E) measurements. Two-Way ANOVA with Bonferroni adjustments were included for multiple comparisons.
